# Supplementary material for: Reaction of singlet oxygen with Ir(i) and Rh(i) thiolato complexes: oxidative addition vs. S-oxidationElectronic supplementary information (ESI) available: experimental crystallographic details. See http://www.rsc.org/suppdata/cc/b1/b110396m/
Source: Royal Society of Chemistry journal article supplement (doi:10.1039/b110396m), 2002-02-27
Supplement: b110396m.doc [file b110396m.doc]

# **Supporting Information**

Single crystal X-ray diffraction data for methylthiolatocarbonyl(bis-triphenylphosphine)peroxo-Iridium (III) complex [Ir(CO)(PPh3)2(SCH3)O2.]

·THF was collected on a SMART APEX CCD diffractometer with graphite monochromated Mo-K radiation ( = 0.71073Å) at room temperature. The cell dimensions and orientation matrix for data collection were obtained from a least-squares refinement of the spots from twenty frames with the use of the SMART program. Data were collected up to a resolution of 0.75Å, and intensities were processed with the use of the program SaintPlus, resulting in a data set of 8454 reflections for the complex. The complex exists as a trigonal bipyramid, with triphenylphosphines in axial positions and the O2, CO and SCH3 ligands in equatorial positions. It was found during the structural analysis that the CO and SCH3 ligands were mutually disordered, and so is the least-squares refinement. Both positions were refined as a 50:50% superposition of the two ligands. Fortunately, the resolution of the data was high enough that all eight half-atoms could be clearly resolved, and the least-squares refinement proceeded with no problems.

Diffraction data for pentafluorobenzenethiolatocarbonyl(bis-triphenylphosphine)peroxo-Iridium (III) complex was collected at T = -100 ºC on a Sienmens P4 diffractometer with Mo-K radiation ( = 0.71073Å). The cell dimensions and orientation matrix for data collection were obtained from a least-squares refinement of the setting angles of at least 25 accurately centered reflections. Data collection in the 2 scan mode, cell refinement and data reduction were carried out with the use of the program XCANS[1] and resulted in data sets of 4895 reflections.

The structures were solved by direct methods using the SHELX [2] package of computer programs, refined by full-matrix least-squares methods based on F2 and corrected for absorption by the program DIFABS[3]. Calculated hydrogen positions were input and refined in a riding manner along with their attached carbons.

References

[2] XSCANS system of data collection solution software: Siemens

Analytical Instruments, Madison, Wisconsin

[2] G. M. Sheldrick, SHELX system of programs for crystallographic

analysis, University of Gottingen, Germany.

[3] Program DIFABS for emperical absoprtion corrections: N. Walker and

D. Stewart, *Acta Cryst*. 1983, A39, 158-166.
